# Supplementary material for: A Novel Mutation in the INSR Causes Severe Insulin Resistance and Rabson-Mendenhall Syndrome in a Paraguayan Patient
Source: Preprints.org preprint supplement (doi:10.20944/preprints202311.0522.v1), 2023-11-08

### **SANGER SEQUENCING FOR VALIDATION OF VARIANTS**

|                                                        | Primer sense 5'to 3'  | Primer size (bp) | Tm | %GC | Amplicon size | Sequence |
|--------------------------------------------------------|-----------------------|------------------|----|-----|---------------|----------|
| <b>KNOWN VARIANT Chr19:7122658, c.C3485T, p.A1162V</b> |                       |                  |    |     |               |          |
| 1VRsnap                                                | CACCAACCCCGTGTTTCTG   | 19               | 58 | 58  | 230           | A        |
| 2VRsnap                                                | CCTGGCCTGGGTCGTTATG   | 19               | 59 | 63  |               |          |
|                                                        |                       |                  |    |     |               |          |
| <b>NOVEL VARIANT Chr19:7267665, c.G332T, p.G111V</b>   |                       |                  |    |     |               |          |
| 5VNRSNAP                                               | ACGAGGCCCGAAGATTTC    | 19               | 59 | 58  | 224           | C        |
| 6VNRSNAP                                               | CCCCGGGTGATGTTTCATCAG | 19               | 59 | 60  |               |          |

#### **SEQUENCE OF KNOWN VARIANT (A)**

CACCAACCCCGTGTTTCTGTTTGTAGAATAATCCTGGCCGCCCTCCCCCTACCCTTCAAGAGATGATTTCAG  
ATGGCGGCAGAGATTGCTGACGGGATGGCCTACCTGAACGCCAAGAAGTTTGTGCATCGGGACCTGG  
CAGCGAGAACTGCATGGTCGCCCATGATTTTACTGTCAAATTGGAGGTTTCGTCTGGCTTTCTGCTTT  
GAAAACATAACGACCCAGGCCAGG

#### **SEQUENCE OF NOVEL VARIANT (C)**

ACGAGGCCCGAAGATTTCGAGACCTCAGTTTCCCCAACTCATCATGATCACTGATTACTTGCTGCTCT  
TCCGGGTCTATGGGCTCGAGAGCCTGAAGGACCTGTTCCCCAACCTCACGGTCATCCGGGGATCACGA  
CTGTTCTTTAACTACGCGCTGGTCATCTTCGAGATGGTTCACCTCAAGGAACTCGGCCTCTACAACCTGA  
TGAACATCACCCGGGG

File: A\_VRsnap\_A\_F.ab1 Run Ended: 2022/6/16 22:5:56 Signal G:2927 A:4137 C:7608 T:4516  
Sample: A\_VRsnap\_A\_F Lane: 15 Base spacing: 14.198061 197 bases in 2405 scans Page 1 of 1

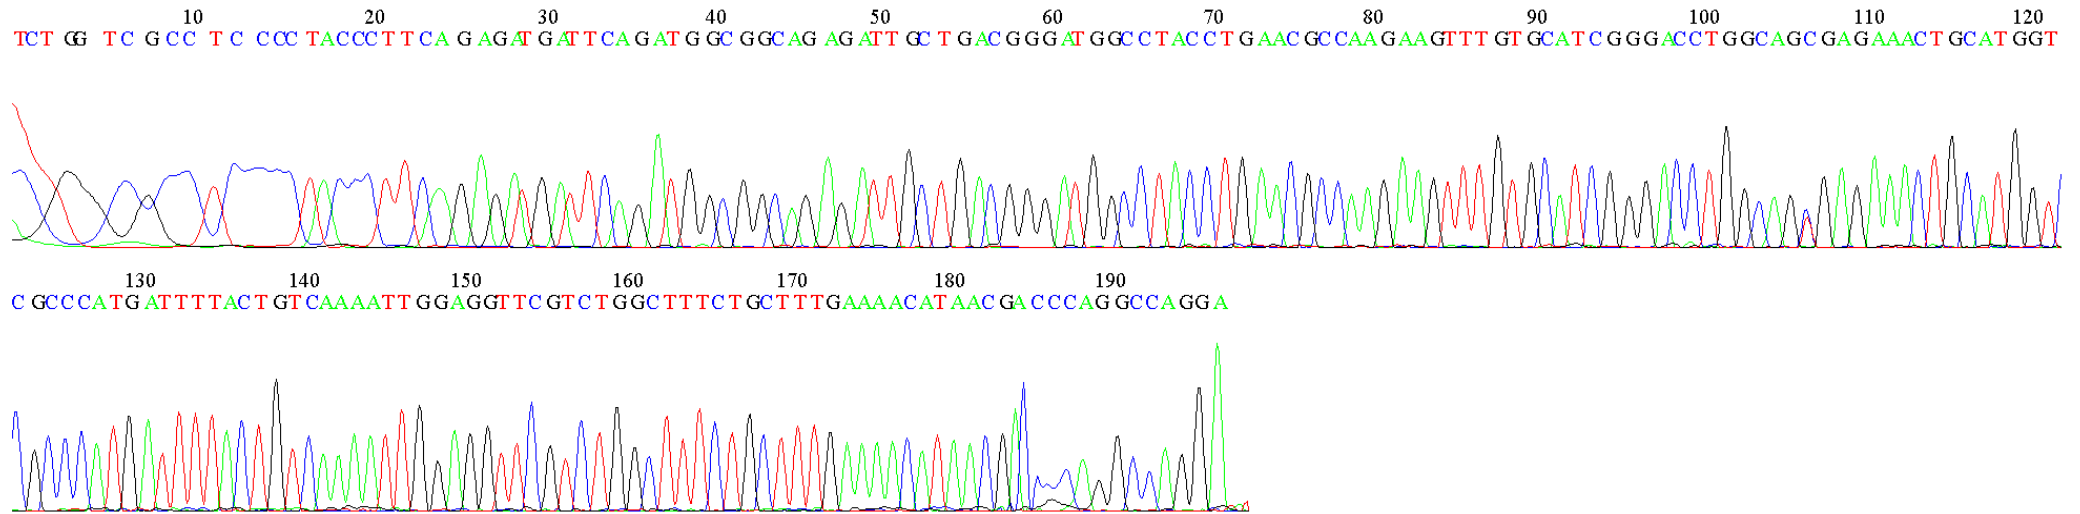

File: A\_VRsnap\_A\_R.ab1 Run Ended: 2022/6/16 22:5:56 Signal G:4819 A:5543 C:11727 T:7066  
Sample: A\_VRsnap\_A\_R Lane: 13 Base spacing: 13.785342 195 bases in 2445 scans Page 1 of 1

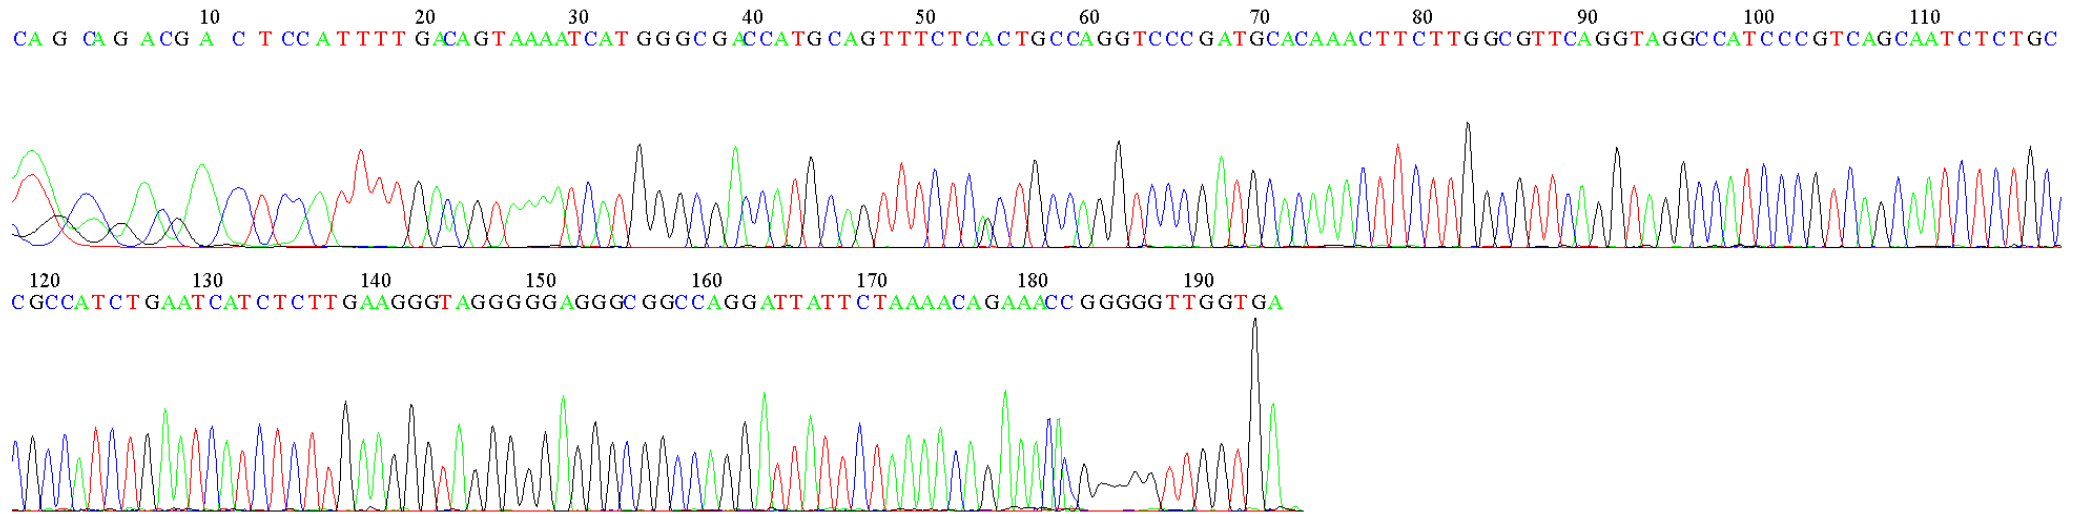

File: C\_VNRSNAP\_C\_F.ab1 Run Ended: 2022/6/16 22:5:56 Signal G:4568 A:6757 C:16750 T:9327  
 Sample: C\_VNRSNAP\_C\_F Lane: 7 Base spacing: 13.93152 194 bases in 2400 scans Page 1 of 1

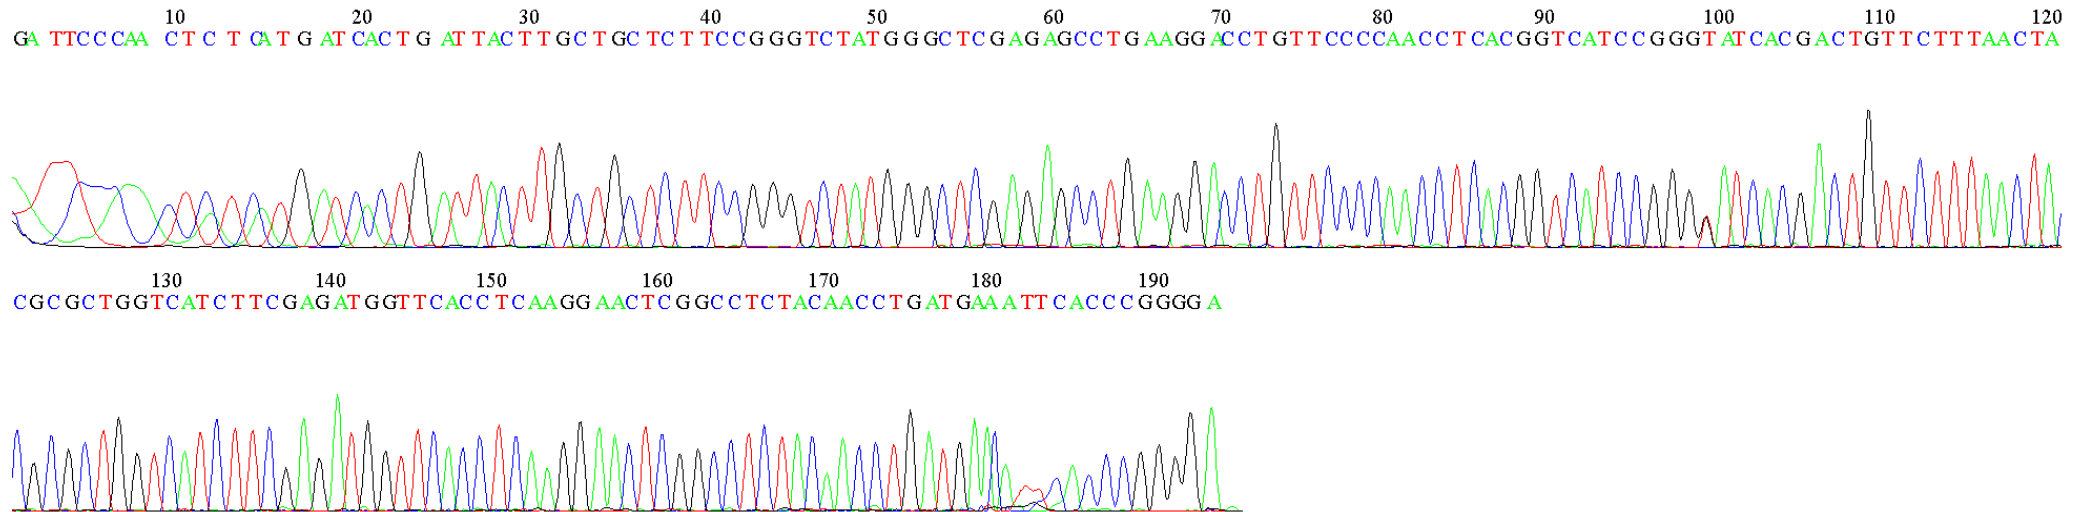

File: C\_VNRSNAP\_C\_R.ab1 Run Ended: 2022/6/16 22:5:56 Signal G:2612 A:4202 C:5341 T:3649  
Sample: C\_VNRSNAP\_C\_R Lane: 5 Base spacing: 14.131732 196 bases in 2368 scans Page 1 of 1

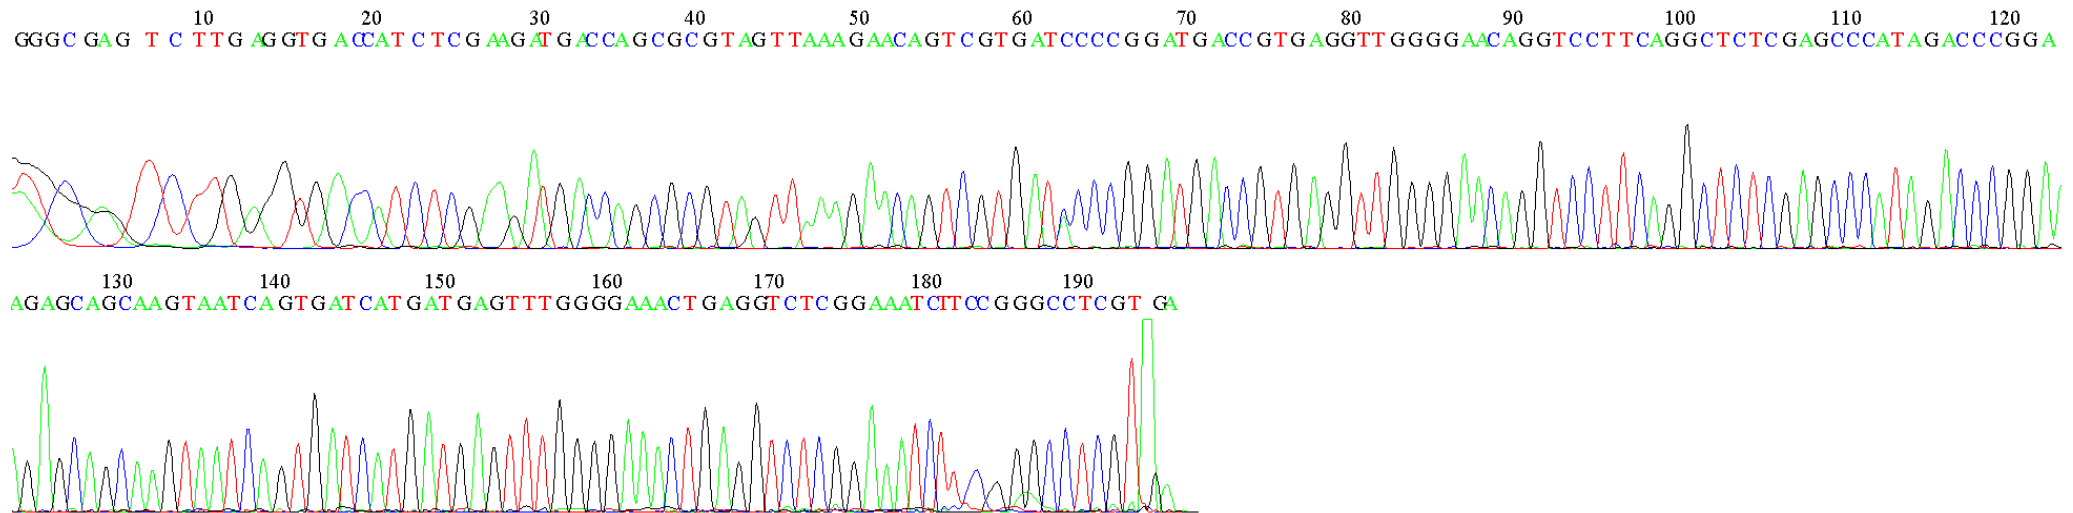

Supplement: Supplementary file 1 [file supplementary]
